# Supplementary material for: Uniform Cu/chitosan beads as a green and reusable catalyst for facile synthesis of iminesviaoxidative coupling reaction
Source: Royal Society of Chemistry journal article supplement (doi:10.1039/d0ra03884a), 2020-01-01
Supplement: d0ra03884a1.pdf [file d0ra03884a1.pdf]

## Supporting Information for

### Uniform Cu/Chitosan Beads as Green and Reusable Catalyst for Facile Synthesis of Imines via Oxidative Coupling Reaction

Threeraphat Chutimasakul, Pakamon Na Nakhonpanom, Warinda Tirdtrakool, Apichai Intanin, Thanthapatra Bunchuay,<sup>a</sup> Rattikan Chantiwas, and Jonggol Tantirungrotechai\*

*Department of Chemistry and Center of Excellence for Innovation in Chemistry, Faculty of Science, Mahidol University, Bangkok 10400, Thailand*

*E-mail: [jonqqol.jar@mahidol.ac.th](mailto:jonqqol.jar@mahidol.ac.th), [jonqqol@gmail.com](mailto:jonqqol@gmail.com)*

---

|                  |                                                                                                                                          |      |
|------------------|------------------------------------------------------------------------------------------------------------------------------------------|------|
| <b>Figure S1</b> | TGA diagrams of Cu/Chitosan beads prepared from Cu(OAc) <sub>2</sub> and Chitosan powder                                                 | p. 2 |
| <b>Figure S2</b> | FTIR spectra of Cu/Chitosan beads prepared from different Cu precursors                                                                  | p. 2 |
| <b>Figure S3</b> | SEM images of Cu/Chitosan beads prepared from Cu(OAc) <sub>2</sub> with copper content of (a) 6, (b) 11, and (c) 14 %wt.                 | p. 3 |
| <b>Figure S4</b> | SEM images of Cu/Chitosan beads: (a) fresh, (b) after 1 <sup>st</sup> use, and (c) after 10 <sup>th</sup> use                            | p. 3 |
| <b>Figure S5</b> | (a) N <sub>2</sub> adsorption-desorption isotherm and (b) pore size distribution of Cu/Chitosan beads prepared from Cu(OAc) <sub>2</sub> | p. 4 |
| <b>Figure S6</b> | (a) <sup>1</sup> H and (b) <sup>13</sup> C NMR spectra of <i>N</i> -benzylidenebenzylamine in CDCl <sub>3</sub>                          | p.5  |
| <b>Table S1</b>  | Computer-controlled sequential operational steps of the reversible-flow system (Figure 1) for preparation of Cu/Chitosan beads           | p. 6 |
| <b>Table S2</b>  | Effect of reaction conditions on the oxidative self-coupling reaction of benzylamine                                                     | p. 7 |

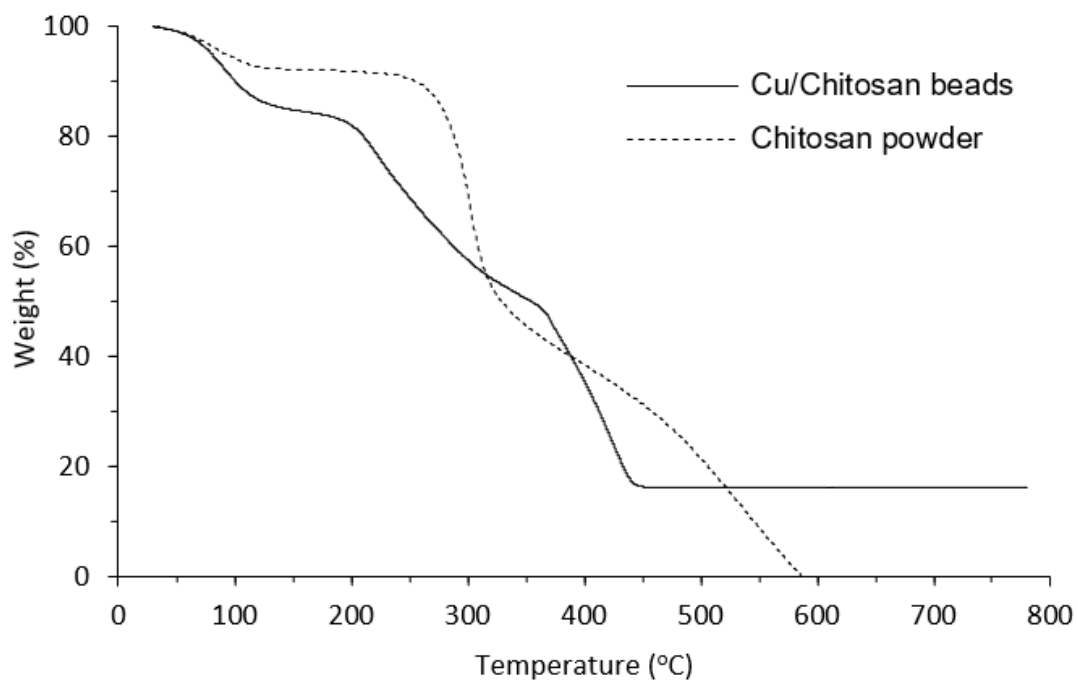

**Figure S1** TGA diagrams of Cu/Chitosan beads prepared from  $\text{Cu}(\text{OAc})_2$  and Chitosan powder

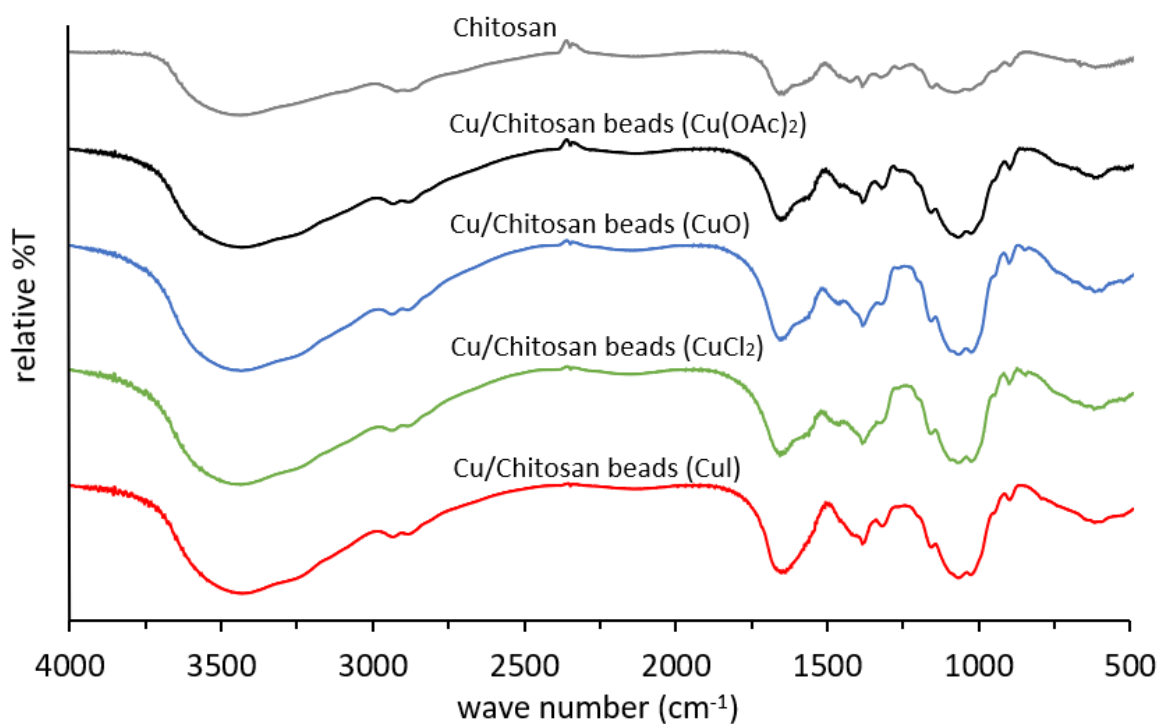

**Figure S2** FTIR spectra of Cu/Chitosan beads prepared from different Cu precursors

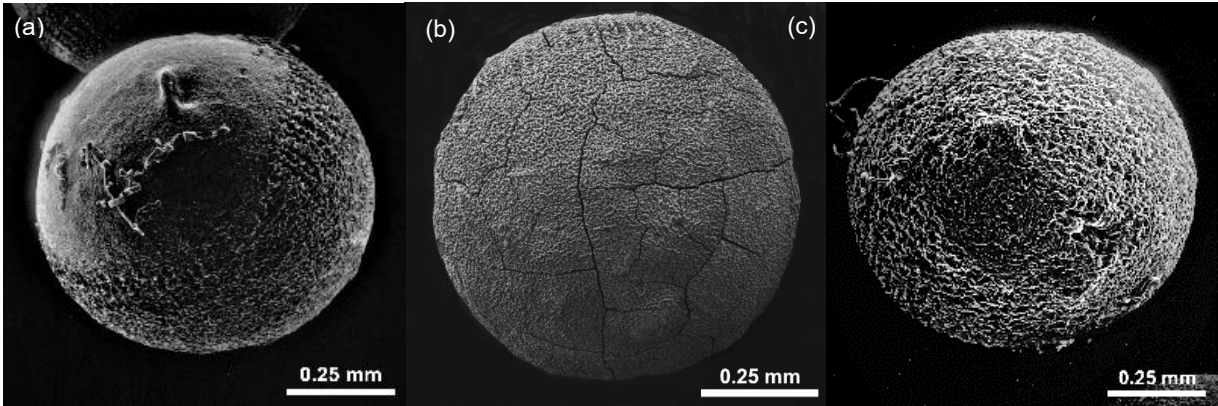

**Figure S3** SEM images of Cu/Chitosan beads prepared from  $\text{Cu}(\text{OAc})_2$  with copper content of (a) 6, (b) 11, and (c) 14 %wt.

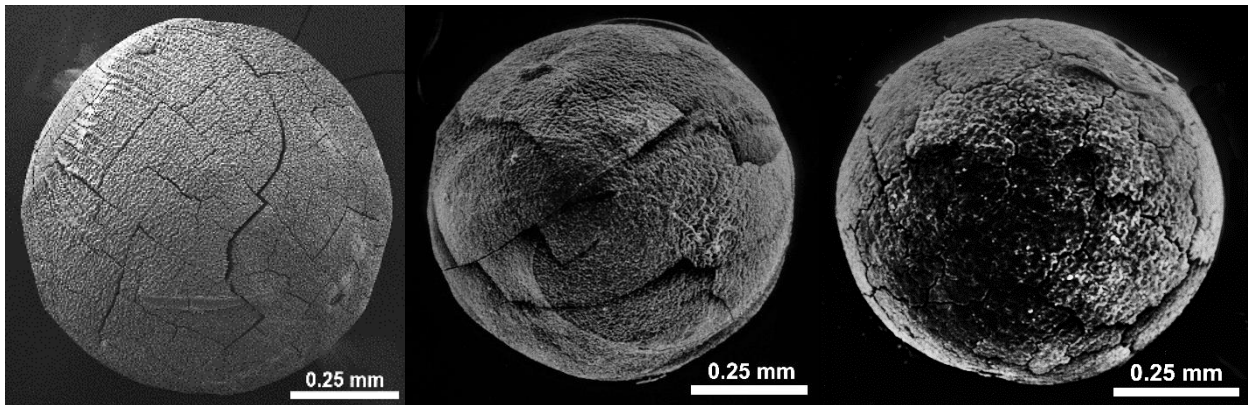

**Figure S4** SEM images of Cu/Chitosan beads: (a) fresh, (b) after 1<sup>st</sup> use, and (c) after 10<sup>th</sup> use

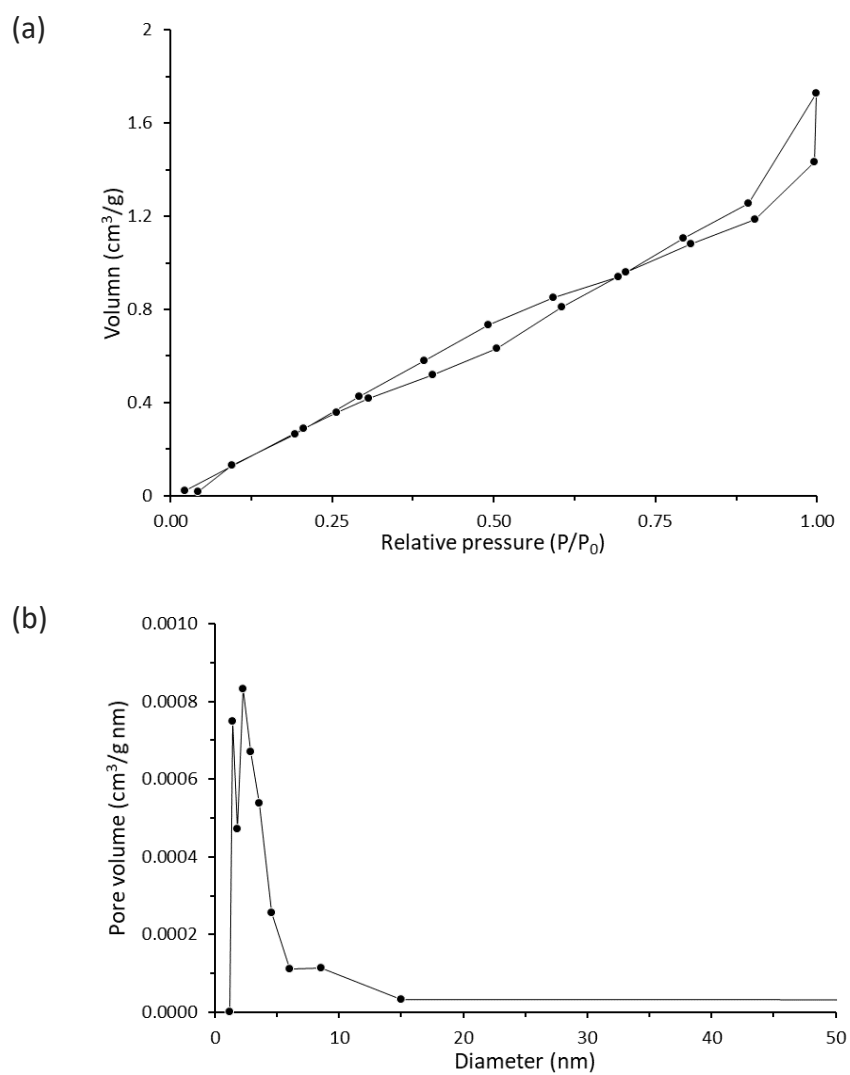

**Figure S5** (a) N<sub>2</sub> adsorption-desorption isotherm and (b) pore size distribution of Cu/Chitosan beads prepared from Cu(OAc)<sub>2</sub>

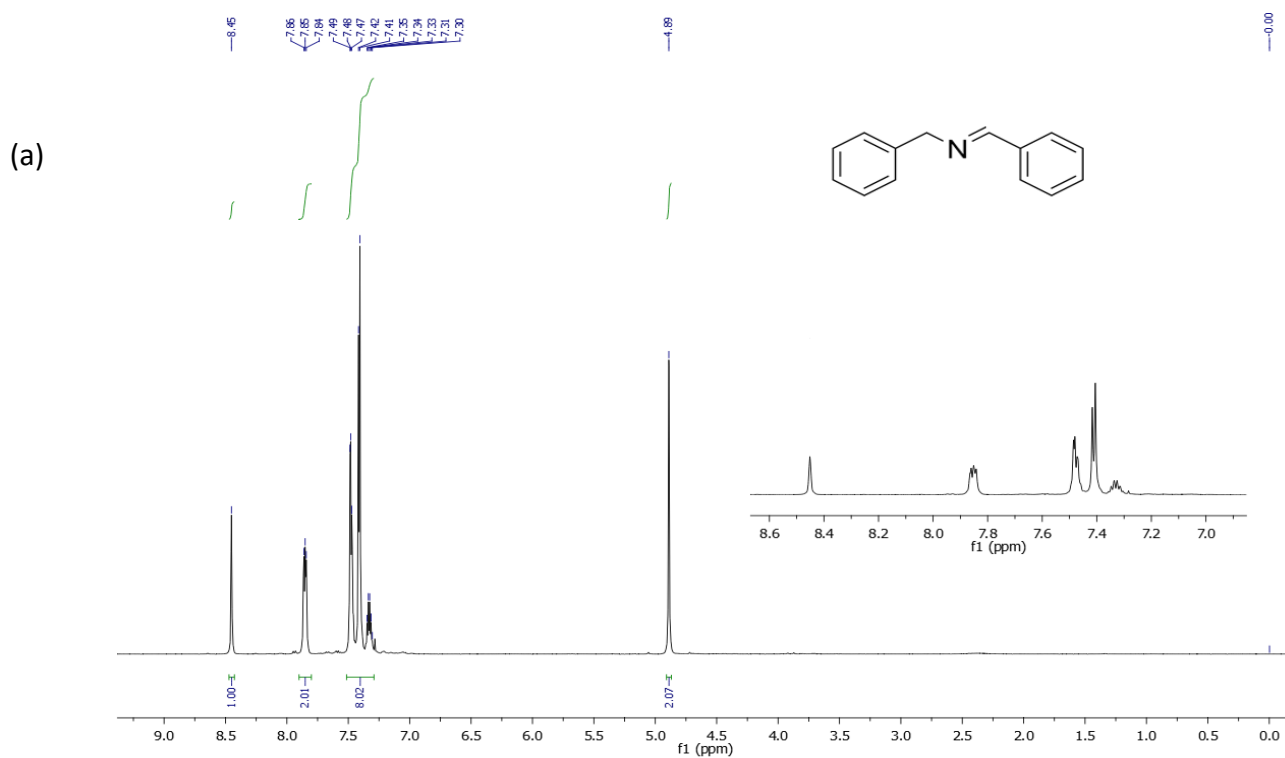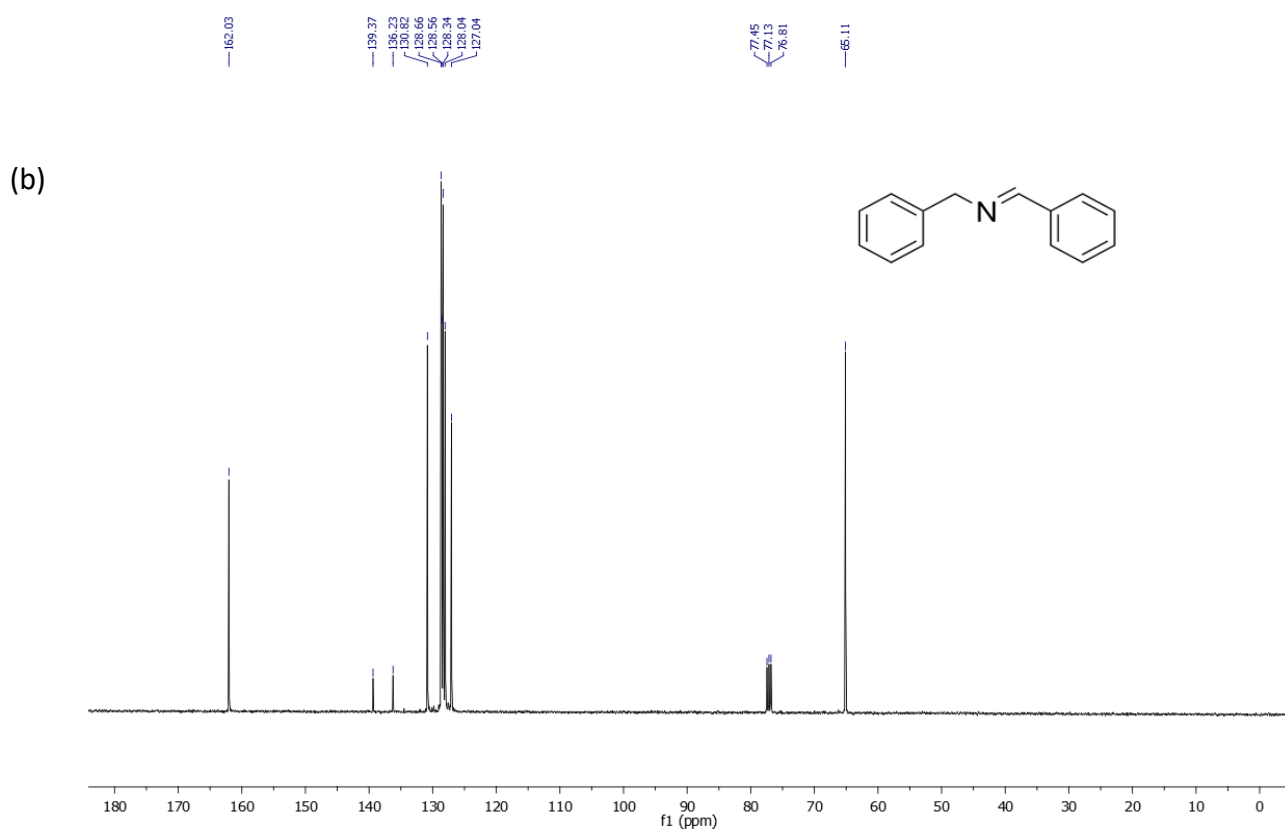

Figure S6 (a)  $^1\text{H}$  and (b)  $^{13}\text{C}$  NMR spectra of N-benzylidenebenzylamine in  $\text{CDCl}_3$

**Table S1** Computer-controlled sequential operational steps of the reversible-flow system (Figure 1) for preparation of Cu/Chitosan beads

| Step                                                                                              | Description                                                                    | Port number of multi-selection valve port | Flow rate ( $\mu\text{L s}^{-1}$ ) | Operation (volume)             |
|---------------------------------------------------------------------------------------------------|--------------------------------------------------------------------------------|-------------------------------------------|------------------------------------|--------------------------------|
| <b>Aspiration of H<sub>2</sub>O carrier into syringe pump (repeat steps 1-2 twice)</b>            |                                                                                |                                           |                                    |                                |
| 1                                                                                                 | Syringe pump valve in; aspirate of the H <sub>2</sub> O                        | 1                                         | 50                                 | Aspirate (5000 $\mu\text{L}$ ) |
| 2                                                                                                 | Syringe pump valve out; dispense of the H <sub>2</sub> O                       | 4                                         | 50                                 | Dispense (5000 $\mu\text{L}$ ) |
| <b>Aspiration of air, Cu/Chitosan solution into holding coil</b>                                  |                                                                                |                                           |                                    |                                |
| 3                                                                                                 | Switched 3-port switching valve; dispense of air plug                          | 4                                         | 10                                 | Aspirate (200 $\mu\text{L}$ )  |
| 4                                                                                                 | Aspirate of Cu/Chitosan solution plug                                          | 4                                         | 10                                 | Aspirate (4000 $\mu\text{L}$ ) |
| <b>Dispersion of Cu/Chitosan solution, air to the tip of tubing</b>                               |                                                                                |                                           |                                    |                                |
| 5                                                                                                 | Switched 3-port switching valve; dispense of Cu/Chitosan solution and air plug | 4                                         | 10                                 | Dispense (4200 $\mu\text{L}$ ) |
| <b>Cleaning of holding coil by 0.2 M HCl solution and H<sub>2</sub>O (repeat steps 6-9 twice)</b> |                                                                                |                                           |                                    |                                |
| 6                                                                                                 | Syringe pump valve in; aspirate of the 0.2 M HCl solution plug                 | 3                                         | 50                                 | Aspirate (5000 $\mu\text{L}$ ) |
| 7                                                                                                 | Syringe pump valve out; dispense of 0.2 M HCl solution plug                    | 4                                         | 50                                 | Empty                          |
| 8                                                                                                 | Syringe pump valve in; aspirate of H <sub>2</sub> O plug                       | 1                                         | 50                                 | Aspirate (5000 $\mu\text{L}$ ) |
| 9                                                                                                 | Syringe pump valve out; dispense of H <sub>2</sub> O plug                      | 1                                         | 50                                 | Empty                          |

**Table S2** Effect of reaction conditions on the oxidative self-coupling reaction of benzylamine<sup>a</sup>

| Entry | Solvent            | Oxidizing agent                   | Temp. (°C) | Catalyst loading | Conv. (%)     | Yield <sup>b</sup> (%) |
|-------|--------------------|-----------------------------------|------------|------------------|---------------|------------------------|
| 1     | Neat               | TBHP                              | 80         | 10 mg            | >99           | 55                     |
| 2     | Toluene            | TBHP                              | 80         | 10 mg            | 70            | 71                     |
| 3     | Acetonitrile       | <b>TBHP</b>                       | <b>80</b>  | <b>10 mg</b>     | <b>&gt;99</b> | <b>98</b>              |
| 4     | Dimethyl formamide | TBHP                              | 80         | 10 mg            | 62            | 62                     |
| 5     | Dimethyl sulfoxide | TBHP                              | 80         | 10 mg            | 56            | 51                     |
| 6     | Ethyl acetate      | TBHP                              | 80         | 10 mg            | 49            | 46                     |
| 7     | Ethanol            | TBHP                              | 80         | 10 mg            | 91            | 28                     |
| 8     | Water              | TBHP                              | 80         | 10 mg            | >99           | 24                     |
| 9     | Acetonitrile       | <b>ambient</b>                    | 80         | 10 mg            | 12            | 12                     |
| 10    | Acetonitrile       | <b>O<sub>2</sub></b> <sup>c</sup> | 80         | 10 mg            | 16            | 14                     |
| 11    | Acetonitrile       | <b>H<sub>2</sub>O<sub>2</sub></b> | 80         | 10 mg            | 62            | 46                     |
| 12    | Acetonitrile       | TBHP                              | <b>30</b>  | 10 mg            | 13            | 10                     |
| 13    | Acetonitrile       | TBHP                              | <b>70</b>  | 10 mg            | 25            | 22                     |
| 14    | Acetonitrile       | TBHP                              | <b>90</b>  | 10 mg            | 97            | 96                     |
| 15    | Acetonitrile       | TBHP                              | 80         | <b>5 mg</b>      | 76            | 73                     |
| 16    | Acetonitrile       | TBHP                              | 80         | <b>15 mg</b>     | 96            | 94                     |
| 17    | Acetonitrile       | TBHP                              | 80         | <b>20 mg</b>     | 95            | 95                     |

<sup>a</sup>Reaction condition: benzylamine (0.5 mmol), solvent (2 mL), oxidizing agent (1 mmol), 30 min <sup>b</sup>GC yield calculated using hexamethylbenzene (10 mg) as internal standard <sup>c</sup>using oxygen gas bubble as the oxidizing agent
